# Supplementary material
Source: PubMed Central journal article supplement (PMC5201198)
Supplement: NIHMS70344-supplement-Supplementary_Tables.pdf [file NIHMS70344-supplement-Supplementary_Tables.pdf]

## Supplementary Tables

**Table S1. Differential gene expression on the transcriptional and translational level as assessed by DESeq2 (FDR = 0.05).** Green depicts down- and blue indicates up-regulated genes in TTNtv animals.

| Ensembl ID          | Gene Symbol | log <sub>2</sub> Fold Change TTNtv / WT |        |          |        | Adj. P-value TTNtv vs WT |         |          |         |
|---------------------|-------------|-----------------------------------------|--------|----------|--------|--------------------------|---------|----------|---------|
|                     |             | RNA-seq                                 |        | Ribo-seq |        | RNA-seq                  |         | Ribo-seq |         |
|                     |             | TTNtvA                                  | TTNtvZ | TTNtvA   | TTNtvZ | TTNtvA                   | TTNtvZ  | TTNtvA   | TTNtvZ  |
| ENSRNOG00000000164  | Lamp2       | 0.01                                    | 0.03   | 0.18     | 0.18   | 0.028                    | n.s.    | n.s.     | n.s.    |
| ENSRNOG00000001522  | Metap1d     | -0.08                                   | -0.06  | -0.03    | 0.04   | n.s.                     | 1.2E-06 | n.s.     | n.s.    |
| ENSRNOG000000003189 | Cited1      | 0.14                                    | 0.33   | 0.11     | 0.19   | n.s.                     | 0.011   | n.s.     | n.s.    |
| ENSRNOG000000003284 | Epn3        | 0.29                                    | 0.41   | 0.04     | 0.06   | n.s.                     | 0.002   | n.s.     | n.s.    |
| ENSRNOG000000003626 | Atp5h       | -0.01                                   | 0.03   | -0.08    | 0.05   | 0.002                    | 0.001   | n.s.     | n.s.    |
| ENSRNOG000000004078 | Eno3        | -0.23                                   | -0.18  | -0.39    | -0.27  | n.s.                     | n.s.    | 5.3E-06  | 0.024   |
| ENSRNOG000000005670 | Art4        | 0.43                                    | 0.40   | 0.39     | 0.49   | 5.6E-04                  | 2.2E-03 | n.s.     | 0.003   |
| ENSRNOG000000006509 | Srgap3      | 0.25                                    | 0.31   | -0.02    | 0.20   | n.s.                     | 0.028   | n.s.     | n.s.    |
| ENSRNOG000000007545 | Angptl4     | 0.09                                    | 0.25   | 0.03     | 0.30   | n.s.                     | 0.016   | n.s.     | n.s.    |
| ENSRNOG000000007674 | Nacad       | 0.27                                    | 0.36   | 0.18     | 0.35   | n.s.                     | 0.013   | n.s.     | n.s.    |
| ENSRNOG000000009691 | Lrrn2       | 0.45                                    | 0.44   | 0.21     | 0.17   | 1.7E-04                  | 3.1E-04 | n.s.     | n.s.    |
| ENSRNOG000000011076 | Ank2        | -0.02                                   | -0.08  | 0.23     | 0.33   | n.s.                     | n.s.    | n.s.     | 0.016   |
| ENSRNOG000000011491 | Dnajc13     | -0.04                                   | -0.04  | 0.08     | 0.17   | n.s.                     | 0.008   | n.s.     | n.s.    |
| ENSRNOG000000014933 | Dnttip1     | 0.03                                    | -0.03  | 0.01     | -0.01  | 3.3E-03                  | 0.000   | n.s.     | n.s.    |
| ENSRNOG000000015852 | Arhgap35    | 0.02                                    | -0.04  | 0.14     | 0.08   | n.s.                     | 0.016   | n.s.     | n.s.    |
| ENSRNOG000000015912 | Ptdss2      | -0.06                                   | -0.10  | 0.06     | 0.06   | n.s.                     | 0.003   | n.s.     | n.s.    |
| ENSRNOG000000016483 | Myo16       | 0.49                                    | 0.64   | 0.37     | 0.45   | 3.4E-05                  | 5.8E-10 | n.s.     | n.s.    |
| ENSRNOG000000016892 | Nr2f6       | -0.05                                   | -0.23  | -0.10    | -0.03  | n.s.                     | 0.028   | n.s.     | n.s.    |
| ENSRNOG000000017460 | Imp3        | 0.00                                    | -0.12  | 0.01     | 0.01   | n.s.                     | 0.003   | n.s.     | n.s.    |
| ENSRNOG000000017503 | Ppargc1b    | -0.14                                   | -0.24  | -0.17    | -0.22  | 0.001                    | 0.001   | n.s.     | n.s.    |
| ENSRNOG000000017786 | Acta1       | -0.42                                   | -0.39  | -0.53    | -0.41  | n.s.                     | n.s.    | 0.003    | n.s.    |
| ENSRNOG000000018610 | Pde6d       | 0.05                                    | -0.04  | 0.05     | 0.02   | 1.8E-08                  | 0.003   | n.s.     | n.s.    |
| ENSRNOG000000019028 | Znrf2       | -0.06                                   | -0.13  | -0.04    | 0.00   | n.s.                     | 0.003   | n.s.     | n.s.    |
| ENSRNOG000000019094 | Gstm2       | 0.06                                    | 0.04   | 0.03     | -0.03  | n.s.                     | 0.016   | n.s.     | n.s.    |
| ENSRNOG000000020263 | Atp1a3      | 0.52                                    | 0.34   | 0.99     | 0.71   | n.s.                     | n.s.    | n.s.     | 1.8E-06 |
| ENSRNOG000000020373 | Dap3        | -0.04                                   | -0.01  | -0.14    | -0.12  | n.s.                     | 0.008   | n.s.     | n.s.    |
| ENSRNOG000000020417 | Gsk3a       | -0.03                                   | -0.07  | -0.09    | 0.00   | 0.001                    | 0.003   | n.s.     | n.s.    |
| ENSRNOG000000020641 | RGD1560789  | -0.16                                   | -0.32  | -0.21    | -0.08  | n.s.                     | 0.034   | n.s.     | n.s.    |
| ENSRNOG000000020650 | Slc17a7     | 0.49                                    | 0.53   | 0.31     | 0.34   | 3.4E-05                  | 2.5E-06 | n.s.     | n.s.    |
| ENSRNOG000000020915 | Setd2       | -0.05                                   | -0.12  | -0.11    | -0.10  | n.s.                     | 0.001   | n.s.     | n.s.    |
| ENSRNOG000000021095 | Fxyd3       | 0.40                                    | 0.33   | 0.25     | 0.26   | 6.5E-04                  | 1.6E-02 | n.s.     | n.s.    |
| ENSRNOG000000021242 | Adam33      | 0.27                                    | 0.48   | 0.09     | 0.18   | n.s.                     | 0.000   | n.s.     | n.s.    |
| ENSRNOG000000022178 | Dcdc5       | -0.25                                   | -0.35  | -0.19    | -0.28  | n.s.                     | 0.015   | n.s.     | n.s.    |
| ENSRNOG000000025518 | Lrrc16b     | 0.19                                    | 0.30   | -0.05    | 0.16   | n.s.                     | 0.001   | n.s.     | n.s.    |
| ENSRNOG000000027959 | Ppp1r12c    | -0.13                                   | -0.13  | -0.25    | -0.45  | n.s.                     | n.s.    | n.s.     | 0.001   |
| ENSRNOG000000028498 | Wdr1        | -0.05                                   | -0.02  | -0.05    | -0.04  | n.s.                     | 0.016   | n.s.     | n.s.    |
| ENSRNOG000000029662 | Wdfy4       | 0.51                                    | 0.45   | 0.32     | 0.39   | 1.5E-07                  | 1.4E-05 | n.s.     | n.s.    |
| ENSRNOG000000030285 | Epha3       | -0.01                                   | 0.16   | 0.23     | 0.42   | n.s.                     | n.s.    | n.s.     | 0.016   |
| ENSRNOG000000031890 | Ncam1       | 0.36                                    | 0.37   | 0.38     | 0.43   | n.s.                     | n.s.    | 0.014    | 0.001   |
| ENSRNOG000000033893 | Cacna1h     | 0.34                                    | 0.36   | 0.24     | 0.30   | 0.034                    | 0.008   | n.s.     | n.s.    |
| ENSRNOG000000039582 | RGD1561161  | 0.19                                    | 0.15   | 0.28     | 0.37   | n.s.                     | n.s.    | n.s.     | 0.039   |
| ENSRNOG000000040201 | Atp6ap1l    | 0.28                                    | 0.38   | 0.22     | 0.34   | n.s.                     | 0.001   | n.s.     | n.s.    |
| ENSRNOG000000042245 | Dcaf7       | -0.06                                   | -0.12  | 0.03     | -0.03  | 0.034                    | n.s.    | n.s.     | n.s.    |
| ENSRNOG000000045992 | Tlr8        | -0.02                                   | -0.06  | 0.40     | 0.42   | n.s.                     | n.s.    | n.s.     | 0.029   |
| ENSRNOG000000046468 | Ptgr        | 0.31                                    | 0.49   | 0.41     | 0.57   | n.s.                     | n.s.    | n.s.     | 0.001   |
| ENSRNOG000000046772 | Fam83c      | 0.26                                    | 0.35   | 0.11     | 0.08   | n.s.                     | 0.016   | n.s.     | n.s.    |
| ENSRNOG000000050145 | Ahnak       | 0.08                                    | 0.01   | 0.32     | 0.35   | n.s.                     | n.s.    | n.s.     | 0.030   |
| ENSRNOG000000050841 | Ache        | 0.11                                    | 0.36   | 0.13     | 0.28   | n.s.                     | 0.003   | n.s.     | n.s.    |

**Table S2. Metabolite measurements of acylcarnitines from WT and TTNtv rat hearts.**

| Acylcarnitine     | Concentration (pmol/mg tissue) |       |              |        |              |       |        |        | TTNtv/WT Ratio | TTNtv/WT P value |
|-------------------|--------------------------------|-------|--------------|--------|--------------|-------|--------|--------|----------------|------------------|
|                   | WT (n=5)                       |       | TTNtvA (n=5) |        | TTNtvZ (n=5) |       | TTNtv  |        |                |                  |
|                   | Mean                           | SD    | Mean         | SD     | Mean         | SD    | Mean   | SD     |                |                  |
| C2                | 394.91                         | 43.55 | 528.12       | 104.03 | 297.18       | 86.89 | 412.65 | 137.78 | 1.04           | 0.717            |
| C3                | 4.36                           | 0.99  | 5.76         | 1.68   | 4.84         | 1.84  | 5.30   | 1.80   | 1.22           | 0.213            |
| C4                | 8.99                           | 1.78  | 11.11        | 1.26   | 7.79         | 1.65  | 9.45   | 2.23   | 1.05           | 0.693            |
| C5:1              | 0.56                           | 0.11  | 0.50         | 0.08   | 0.61         | 0.18  | 0.55   | 0.14   | 0.99           | 0.966            |
| C5                | 1.26                           | 0.43  | 1.24         | 0.42   | 1.78         | 0.90  | 1.51   | 0.69   | 1.20           | 0.404            |
| C4-OH             | 8.02                           | 2.43  | 9.98         | 2.85   | 8.20         | 5.40  | 9.09   | 4.21   | 1.13           | 0.544            |
| C6                | 3.16                           | 0.92  | 2.45         | 0.80   | 1.40         | 0.58  | 1.93   | 0.71   | 0.61           | 0.036            |
| C5-OH/C3-DC       | 3.67                           | 0.51  | 4.23         | 0.66   | 3.08         | 0.53  | 3.66   | 0.82   | 1.00           | 0.971            |
| C4-DCC6-OH        | 10.77                          | 1.78  | 13.32        | 2.02   | 9.63         | 2.12  | 11.47  | 2.63   | 1.07           | 0.553            |
| C8                | 1.14                           | 0.43  | 0.87         | 0.36   | 0.53         | 0.23  | 0.70   | 0.25   | 0.61           | 0.081            |
| C5-DC             | 0.49                           | 0.05  | 0.50         | 0.05   | 0.41         | 0.05  | 0.45   | 0.07   | 0.92           | 0.226            |
| C8-OH/C6-DC       | 0.38                           | 0.08  | 0.41         | 0.14   | 0.20         | 0.10  | 0.30   | 0.16   | 0.80           | 0.235            |
| C12:1             | 0.54                           | 0.20  | 0.49         | 0.17   | 0.33         | 0.09  | 0.41   | 0.11   | 0.76           | 0.235            |
| C12               | 1.91                           | 0.71  | 1.54         | 0.61   | 0.95         | 0.49  | 1.25   | 0.46   | 0.66           | 0.110            |
| C12:1-OH          | 0.09                           | 0.02  | 0.08         | 0.03   | 0.05         | 0.02  | 0.06   | 0.02   | 0.68           | <b>0.041</b>     |
| C12-OH/C10-DC     | 0.12                           | 0.03  | 0.12         | 0.03   | 0.07         | 0.04  | 0.10   | 0.04   | 0.78           | 0.139            |
| C14:2             | 0.70                           | 0.32  | 0.55         | 0.30   | 0.47         | 0.22  | 0.51   | 0.19   | 0.73           | 0.270            |
| C14:1             | 2.93                           | 0.97  | 2.68         | 0.79   | 1.95         | 0.80  | 2.31   | 0.68   | 0.79           | 0.251            |
| C14               | 7.54                           | 2.77  | 5.97         | 2.56   | 4.61         | 1.68  | 5.29   | 1.36   | 0.70           | 0.147            |
| C14:2-OH          | 0.41                           | 0.16  | 0.30         | 0.18   | 0.33         | 0.21  | 0.31   | 0.15   | 0.75           | 0.271            |
| C14:1-OH          | 1.48                           | 0.47  | 1.20         | 0.54   | 0.81         | 0.31  | 1.00   | 0.34   | 0.68           | 0.090            |
| C14-OH/C12-DC     | 0.80                           | 0.13  | 0.74         | 0.13   | 0.63         | 0.28  | 0.69   | 0.20   | 0.86           | 0.219            |
| C16:2             | 1.42                           | 0.61  | 1.24         | 0.50   | 1.11         | 0.39  | 1.17   | 0.29   | 0.83           | 0.431            |
| C16:1             | 7.94                           | 2.46  | 6.81         | 1.84   | 4.85         | 2.55  | 5.83   | 2.02   | 0.73           | 0.142            |
| C16               | 39.33                          | 12.07 | 29.09        | 11.32  | 21.63        | 9.28  | 25.36  | 7.62   | 0.64           | 0.059            |
| C16:2-OH          | 0.50                           | 0.13  | 0.38         | 0.15   | 0.32         | 0.12  | 0.35   | 0.10   | 0.70           | 0.069            |
| C16:1-OH/C14:1-DC | 1.71                           | 0.46  | 1.48         | 0.46   | 1.28         | 0.59  | 1.38   | 0.42   | 0.81           | 0.213            |
| C16-OH            | 2.11                           | 0.35  | 2.11         | 0.22   | 1.94         | 0.93  | 2.03   | 0.65   | 0.96           | 0.760            |
| C18:3             | 2.29                           | 1.04  | 1.35         | 1.05   | 1.05         | 0.24  | 1.20   | 0.31   | 0.52           | 0.077            |
| C18:2             | 17.85                          | 8.08  | 11.51        | 7.94   | 9.49         | 2.42  | 10.50  | 2.42   | 0.59           | 0.111            |
| C18:1             | 39.98                          | 13.59 | 29.46        | 12.27  | 20.50        | 10.26 | 24.98  | 8.64   | 0.62           | 0.068            |
| C18               | 12.03                          | 3.78  | 6.56         | 4.63   | 6.02         | 1.85  | 6.29   | 1.55   | 0.52           | <b>0.025</b>     |
| C18:2-OH/C16:2-DC | 0.94                           | 0.32  | 0.85         | 0.25   | 1.02         | 0.57  | 0.93   | 0.39   | 1.00           | 0.993            |
| C18:1-OH/C16:1-DC | 2.62                           | 0.59  | 2.58         | 0.37   | 2.27         | 1.20  | 2.43   | 0.84   | 0.93           | 0.618            |
| C18-OH/C16-DC     | 0.71                           | 0.20  | 0.60         | 0.19   | 0.58         | 0.25  | 0.59   | 0.17   | 0.83           | 0.265            |
| C20:4             | 1.72                           | 0.64  | 0.92         | 0.82   | 0.85         | 0.36  | 0.89   | 0.35   | 0.51           | <b>0.040</b>     |
| C20:3             | 0.51                           | 0.17  | 0.32         | 0.20   | 0.31         | 0.13  | 0.32   | 0.10   | 0.62           | 0.067            |
| C20:2             | 0.71                           | 0.19  | 0.65         | 0.13   | 0.70         | 0.48  | 0.68   | 0.33   | 0.95           | 0.794            |
| C20:1             | 1.37                           | 0.37  | 1.20         | 0.29   | 1.19         | 0.71  | 1.20   | 0.49   | 0.88           | 0.468            |
| C20               | 0.31                           | 0.09  | 0.24         | 0.08   | 0.20         | 0.11  | 0.22   | 0.08   | 0.71           | 0.098            |
| C20:1-OH/C18:1-DC | 0.32                           | 0.08  | 0.34         | 0.03   | 0.29         | 0.16  | 0.32   | 0.11   | 1.00           | 0.985            |
| C20-OH/C18-DC     | 0.15                           | 0.06  | 0.11         | 0.06   | 0.08         | 0.02  | 0.09   | 0.03   | 0.60           | 0.094            |
| C22:4             | 0.12                           | 0.04  | 0.07         | 0.06   | 0.07         | 0.05  | 0.07   | 0.05   | 0.59           | 0.076            |
| C22:1             | 0.13                           | 0.04  | 0.14         | 0.03   | 0.12         | 0.05  | 0.13   | 0.04   | 1.04           | 0.798            |
| C22               | 0.11                           | 0.03  | 0.15         | 0.02   | 0.07         | 0.01  | 0.11   | 0.05   | 1.04           | 0.825            |

**Table S3. Metabolite measurements of glycolysis intermediates from WT and TTNtv hearts.**

| Metabolite                 | Concentration (nmol/g tissue) |      |              |      |              |      |       |      |          |         |
|----------------------------|-------------------------------|------|--------------|------|--------------|------|-------|------|----------|---------|
|                            | WT (n=6)                      |      | TTNtvA (n=6) |      | TTNtvZ (n=6) |      | TTNtv |      | TTNtv/WT |         |
|                            | Mean                          | SD   | Mean         | SD   | Mean         | SD   | Mean  | SD   | Ratio    | P value |
| Dihydroxyacetone phosphate | 176                           | 64   | 183          | 49   | 172          | 46   | 177   | 46   | 1        | 0.96    |
| Fructose 1,6-diphosphate   | 271                           | 129  | 297          | 138  | 299          | 127  | 298   | 126  | 1.1      | 0.68    |
| Fructose 6-phosphate       | 349                           | 156  | 380          | 152  | 409          | 167  | 394   | 153  | 1.1      | 0.57    |
| Glucose 1-phosphate        | 117                           | 50   | 125          | 49   | 132          | 54   | 129   | 49   | 1.1      | 0.63    |
| Glucose 6-phosphate        | 1460                          | 715  | 1605         | 709  | 1773         | 805  | 1689  | 728  | 1.2      | 0.54    |
| Lactic acid                | 13744                         | 2540 | 15430        | 2501 | 14835        | 3163 | 15132 | 2736 | 1.1      | 0.31    |
| Phosphoenolpyruvic acid    | 10                            | 2    | 10           | 2    | 11           | 1    | 11    | 2    | 1.1      | 0.43    |

**Table S4. TTNtvs in expressed exons (PSI>15%) in healthy individuals who underwent cardiac MRI in the Digital Heart Project.**

| Sample identification | Hg19 genomic start position | LRG genomic start position | Transcript effect | Protein effect | Exon number | Median exon PSI | Present in NZBA | Present in NZB | Band   | Variant type            | ExAC frequency |
|-----------------------|-----------------------------|----------------------------|-------------------|----------------|-------------|-----------------|-----------------|----------------|--------|-------------------------|----------------|
| 14AB03203             | 179629515                   | 71015                      | c.9727C>T         | p.Q3243X       | 42          | 100             | Y               | Y              | I-band | Nonsense                | 0              |
| 14ZN01340             | 179595884                   | 104646                     | c.17508dupA       | NA             | 61          | 35              | Y               |                | I-band | Frameshift              | 0              |
| 14JD01896             | 179588844                   | 111686                     | c.21142C>T        | p.R7048X       | 74          | 25              | Y               |                | I-band | Nonsense                | 0.00002        |
| 14AL03036             | 179563642                   | 136888                     | c.30683-1G>T      | NA             | 113         | 80              | Y               |                | I-band | Splice acceptor variant | 0              |
| 14EC01433             | 179560998                   | 139532                     | c.30803-2A>G      | NA             | 115         | 74              | Y               |                | I-band | Splice acceptor variant | 0              |
| 14MS02961             | 179554624                   | 145906                     | c.31763-1G>A      | NA             | 123         | 78              | Y               |                | I-band | Splice acceptor variant | 0.00027        |
| 14RH03039             | 179554624                   | 145906                     | c.31763-1G>A      | NA             | 123         | 78              | Y               |                | I-band | Splice acceptor variant | 0.00027        |
| 14CB02200             | 179506963                   | 193567                     | c.40558+1G>A      | NA             | 220         | 100             | Y               | Y              | I-band | Splice donor variant    | 0.00012        |
| 14HB02599             | 179495671                   | 204859                     | c.44015-1G>T      | NA             | 239         | 100             | Y               | Y              | I-band | Splice acceptor variant | 0              |
| 14MC01427             | 179486054                   | 214476                     | c.45391delA       | NA             | 247         | 100             | Y               | Y              | I-band | Frameshift              | 0              |
| 14RS02105             | 179479631                   | 220899                     | c.48703C>T        | p.Q16235X      | 261         | 100             | Y               | Y              | A-band | Nonsense                | 0              |
| 14JM01448             | 179444855                   | 255675                     | c.67159delA       | p.I22387X      | 319         | 100             | Y               | Y              | A-band | Frameshift              | 0              |
| 14SM01546             | 179444666                   | 255864                     | c.67348C>T        | p.Q22450X      | 319         | 100             | Y               | Y              | A-band | Nonsense                | 0              |
| 14JC01930             | 179404286                   | 296244                     | c.98506C>T        | p.R32836X      | 353         | 100             | Y               | Y              | A-band | Nonsense                | 0              |
| 14TW02859             | 179394786                   | 305744                     | c.106432G>T       | p.E35478X      | 360         | 100             | Y               | Y              | M-band | Nonsense                | 0              |

**Table S5: For each cardiac phenotype two linear regression models were built to adjust for the known contribution of clinical variables. The first model was optimized to minimize the Bayesian Information Criterion. To the optimized first model, the *ttt* genotype was then added to create a second model and details of this presented here. The two models were then compared using ANOVA. BSA = body surface area; LVEDV = left ventricular end diastolic volume; LVESV = left ventricular end systolic volume; LVEF = left ventricular ejection fraction; LVM = left ventricular mass; SBP = systolic blood pressure; TTNtv = titin truncating variants.**

| Phenotype         | Model Terms              | Unstandardized Coefficient | Standardized Coefficient | Standard Error | Component P value       | Full model              |                          | P value for comparison between models |
|-------------------|--------------------------|----------------------------|--------------------------|----------------|-------------------------|-------------------------|--------------------------|---------------------------------------|
|                   |                          |                            |                          |                |                         | Adjusted R <sup>2</sup> | P value                  |                                       |
| <b>LVEDV (ml)</b> | (Intercept)              | -3.99                      | 0                        | 7.46           | 0.59                    | 0.58                    | 4.57 x10 <sup>-261</sup> | 0.03                                  |
|                   | Age (years)              | -0.54                      | -0.23                    | 0.04           | 1.13 x10 <sup>-31</sup> |                         |                          |                                       |
|                   | Gender (male)            | 13.8                       | 0.21                     | 1.44           | 3.52 x10 <sup>-21</sup> |                         |                          |                                       |
|                   | SBP (mmHg)               | 0.15                       | 0.07                     | 0.04           | 0.001                   |                         |                          |                                       |
|                   | Race                     | -4.64                      | -0.12                    | 0.65           | 2.05 x10 <sup>-12</sup> |                         |                          |                                       |
|                   | BSA (kg/m <sup>2</sup> ) | 75.3                       | 0.48                     | 3.53           | 9.08 x10 <sup>-88</sup> |                         |                          |                                       |
|                   | Activity Score           | 8.06                       | 0.22                     | 0.66           | 3.23 x10 <sup>-32</sup> |                         |                          |                                       |
|                   | Heart Rate (bpm)         | -0.13                      | -0.07                    | 0.03           | 1.47 x10 <sup>-05</sup> |                         |                          |                                       |
| TTNtv             | 11.9                     | 0.04                       | 5.39                     | 0.03           |                         |                         |                          |                                       |
| <b>LVESV (ml)</b> | (Intercept)              | 4.58                       | 0                        | 4              | 0.25                    | 0.43                    | 5.4 x10 <sup>-170</sup>  | 0.015                                 |
|                   | Age (years)              | -0.29                      | -0.24                    | 0.02           | 2.25 x10 <sup>-30</sup> |                         |                          |                                       |
|                   | Gender (male)            | 9.06                       | 0.28                     | 0.83           | 1.33 x10 <sup>-26</sup> |                         |                          |                                       |
|                   | Race                     | -1.8                       | -0.09                    | 0.38           | 3.21 x10 <sup>-06</sup> |                         |                          |                                       |
|                   | BSA (kg/m <sup>2</sup> ) | 26.2                       | 0.33                     | 2.03           | 7.29 x10 <sup>-36</sup> |                         |                          |                                       |
|                   | Activity Score           | 3.73                       | 0.19                     | 0.39           | 4.25 x10 <sup>-21</sup> |                         |                          |                                       |
|                   | Heart Rate (bpm)         | -0.04                      | -0.05                    | 0.02           | 0.008                   |                         |                          |                                       |
|                   | TTNtv                    | 7.69                       | 0.05                     | 3.17           | 0.015                   |                         |                          |                                       |
| <b>LVEF (%)</b>   | (Intercept)              | 60.5                       | 0                        | 1.18           | <1x10 <sup>-100</sup>   | 0.14                    | 3.05 x10 <sup>-43</sup>  | 0.03                                  |
|                   | Age (years)              | 0.07                       | 0.18                     | 0.01           | 4.79 x10 <sup>-11</sup> |                         |                          |                                       |
|                   | Gender (male)            | -2.95                      | 0.27                     | 0.28           | 7.93 x10 <sup>-24</sup> |                         |                          |                                       |
|                   | SBP (mmHg)               | 0.04                       | 0.12                     | 0.01           | 2.12 x10 <sup>-05</sup> |                         |                          |                                       |
|                   | Activity Score           | -0.65                      | -0.11                    | 0.16           | 3.32 x10 <sup>-05</sup> |                         |                          |                                       |
|                   | TTNtv                    | -2.81                      | -0.05                    | 1.29           | 0.03                    |                         |                          |                                       |
